# Supplementary material for: No Ethnic Differences in the Association of Glycated Hemoglobin With Retinopathy: The National Health and Nutrition Examination Survey 2005–2008
Source: PubMed Central journal article supplement — Diabetes Care. 2013 Feb 13;36(3):569–73. doi: 10.2337/dc12-0404 (PMC3579340; doi:10.2337/dc12-0404), 2013-02-13
Supplement: supp_dc12-0404v120404_DC120404SupplementaryData.pdf [file supp_dc12-0404v120404_DC120404SupplementaryData.pdf]

SUPPLEMENTARY DATA

**Supplementary Table 1.** Unadjusted and Adjusted Odds Ratios for Retinopathy (defined as ETDRS score  $\geq 20$ ) by Ethnicity, Diagnosed Diabetes Status, and HbA1c% Category, Adults Aged  $\geq 40$  Years, NHANES 2005-2008

|                                       | No History of Diabetes |                      |                       | Diagnosed Diabetes        |                         |
|---------------------------------------|------------------------|----------------------|-----------------------|---------------------------|-------------------------|
|                                       | < 5.7%                 | 5.7-6.4%             | $\geq 6.5\%$          | < 7.0%                    | $\geq 7.0\%$            |
| <b>Crude</b>                          |                        |                      |                       |                           |                         |
| Non-Hispanic White                    | 1.00 (ref)             | 1.67<br>(1.03-2.70)* | 2.35<br>(0.87-6.31)   | 6.35<br>(4.72-8.53-6.14)* | 24.31<br>(14.35-41.18)* |
| Non-Hispanic Black                    | 1.00 (ref)             | 2.06<br>(0.85-4.97)  | 2.89<br>(1.09-7.65)*  | 5.30<br>(1.88-14.95)*     | 26.53<br>(11.06-63.61)* |
| Hispanic American                     | 1.00 (ref)             | 1.64<br>(0.67-4.00)  | 5.44<br>(2.64-11.19)* | 3.21<br>(1.30-7.90)*      | 13.67<br>(7.74-24.13)*  |
| <i>p-for-interaction = 0.43</i>       |                        |                      |                       |                           |                         |
| <b>Age and sex-adjusted</b>           |                        |                      |                       |                           |                         |
| Non-Hispanic White                    | 1.00 (ref)             | 1.55<br>(0.95-2.52)  | 2.02<br>(0.73-5.58)   | 5.76<br>(4.07-8.15)*      | 21.95<br>(12.98-37.10)* |
| Non-Hispanic Black                    | 1.00 (ref)             | 1.92<br>(0.80-4.59)  | 2.57<br>(0.98-6.75)   | 4.49<br>(1.60-12.61)*     | 24.18<br>(10.51-55.61)* |
| Hispanic American                     | 1.00 (ref)             | 1.60<br>(0.67-3.83)  | 5.40<br>(2.61-11.16)* | 3.16<br>(1.19-8.34)*      | 14.79<br>(7.83-27.92)*  |
| <i>p-for-interaction = 0.47</i>       |                        |                      |                       |                           |                         |
| <b>Multivariable* adjusted models</b> |                        |                      |                       |                           |                         |
| Non-Hispanic White                    | 1.00 (ref)             | 1.49<br>(0.89-2.49)  | 1.94<br>(0.66-5.73)   | 5.74<br>(3.74-8.80)*      | 22.77<br>(13.20-39.29)* |
| Non-Hispanic Black                    | 1.00 (ref)             | 1.94<br>(0.82-4.59)  | 2.65<br>(0.94-7.52)   | 4.08<br>(1.36-12.18)*     | 4.08<br>(1.36-12.18)*   |
| Hispanic American                     | 1.00 (ref)             | 1.79<br>(0.73-4.38)  | 6.19<br>(2.81-13.62)* | 3.43<br>(1.29-9.13)*      | 14.94<br>(6.98-31.96)*  |
| <i>p-for-interaction = 0.44</i>       |                        |                      |                       |                           |                         |

\* Adjusted for age, sex, body mass index ( $\text{kg}/\text{m}^2$ ), hypertension status (yes; no based on self-report or measured blood pressure), history of coronary heart disease (yes; no), total cholesterol (mg/dL), education (<12 year;  $\geq 12$  years), income (poverty income ratio < 1; poverty income ratio  $\geq 1$ ), and smoking status (current; former; never)

SUPPLEMENTARY DATA

**Supplementary Table 2.** Odds Ratios Per 1-% Point HbA1c for Retinopathy (defined as ETDRS score  $\geq 20$ ) by Ethnicity and Diabetes Status, Adults Aged  $\geq 40$  Years, NHANES 2005-2008

|                                       | No History of Diabetes | Diagnosed Diabetes |
|---------------------------------------|------------------------|--------------------|
| <b>Crude</b>                          |                        |                    |
| Non-Hispanic White                    | 1.65 (1.25-2.17)       | 1.63 (1.34-1.97)   |
| Non-Hispanic Black                    | 1.41 (1.25-2.17)       | 1.38 (1.13-1.70)   |
| Hispanic American                     | 1.58 (1.26-1.82)       | 1.45 (1.14-1.83)   |
| <i>p-for-interaction</i>              | 0.68                   | 0.48               |
| <b>Age and sex-adjusted</b>           |                        |                    |
| Non-Hispanic White                    | 1.57 (1.18-2.09)       | 1.66 (1.38-1.99)   |
| Non-Hispanic Black                    | 1.41 (1.09-1.84)       | 1.42 (1.13-1.79)   |
| Hispanic American                     | 1.54 (1.22-1.96)       | 1.52 (1.17-1.98)   |
| <i>p-for-interaction</i>              | 0.83                   | 0.56               |
| <b>Multivariable* adjusted models</b> |                        |                    |
| Non-Hispanic White                    | 1.53 (1.13-2.08)       | 1.73 (1.44-2.08)   |
| Non-Hispanic Black                    | 1.40 (1.08-1.81)       | 1.44 (1.12-1.86)   |
| Hispanic American                     | 1.58 (1.24-2.02)       | 1.53 (1.18-1.99)   |
| <i>p-for-interaction</i>              | 0.77                   | 0.51               |

\*Adjusted for age, sex, body mass index ( $\text{kg/m}^2$ ), hypertension status (yes; no based on self-reported or measured blood pressure), history of coronary heart disease (yes; no), total cholesterol (mg/dL), education ( $<12$  year;  $\geq 12$  years), income (poverty income ratio  $< 1$ ; poverty income ratio  $\geq 1$ ), and smoking status (current; former; never).

SUPPLEMENTARY DATA

**Supplementary Figure 1.** Distribution of Retinopathy Severity Scores by Ethnicity, NHANES 2005-2008

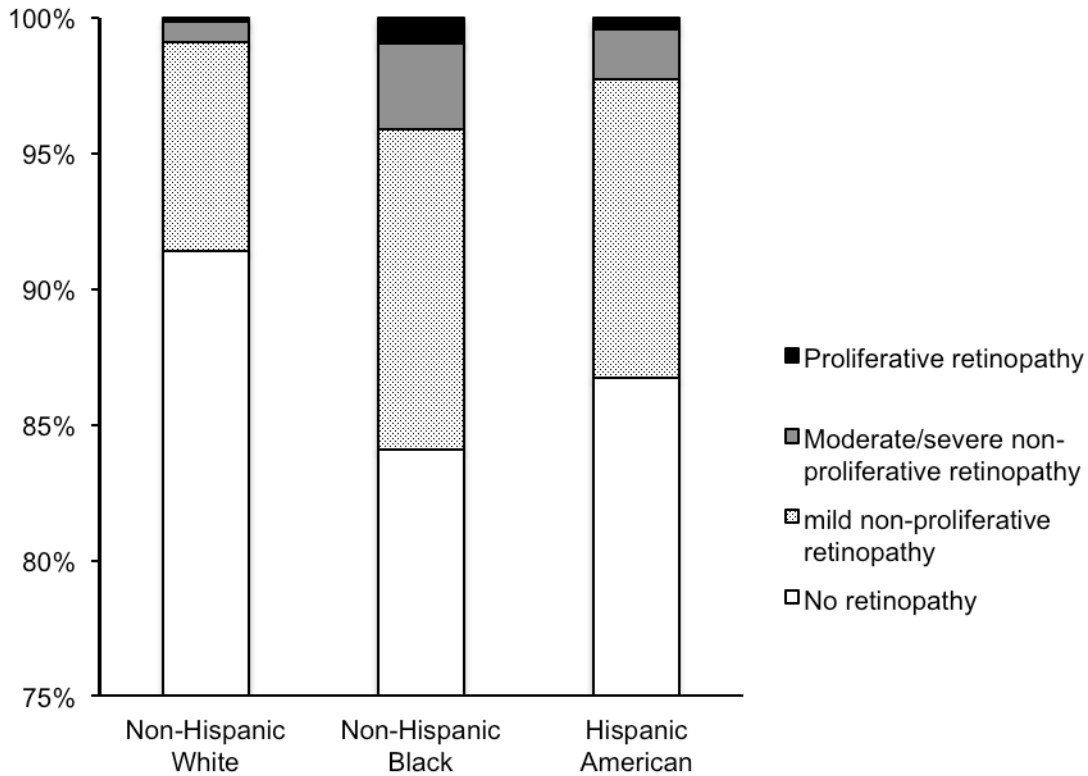

Proportions are weighted to account for the complex survey design. Based on the EDTRS score, no retinopathy=levels 10-13; mild non-proliferative retinopathy=levels 14-31; moderate/severe non-proliferative retinopathy=levels 41-51; and proliferative retinopathy=levels 60-80.

SUPPLEMENTARY DATA

**Supplementary Figure 2.** Adjusted\* Odds Ratios (95% CI) for Retinopathy Per 1-% Point Difference in HbA1c by Ethnic Group and Diabetes Status, Adults Aged  $\geq 40$  Years, NHANES 2005-2008

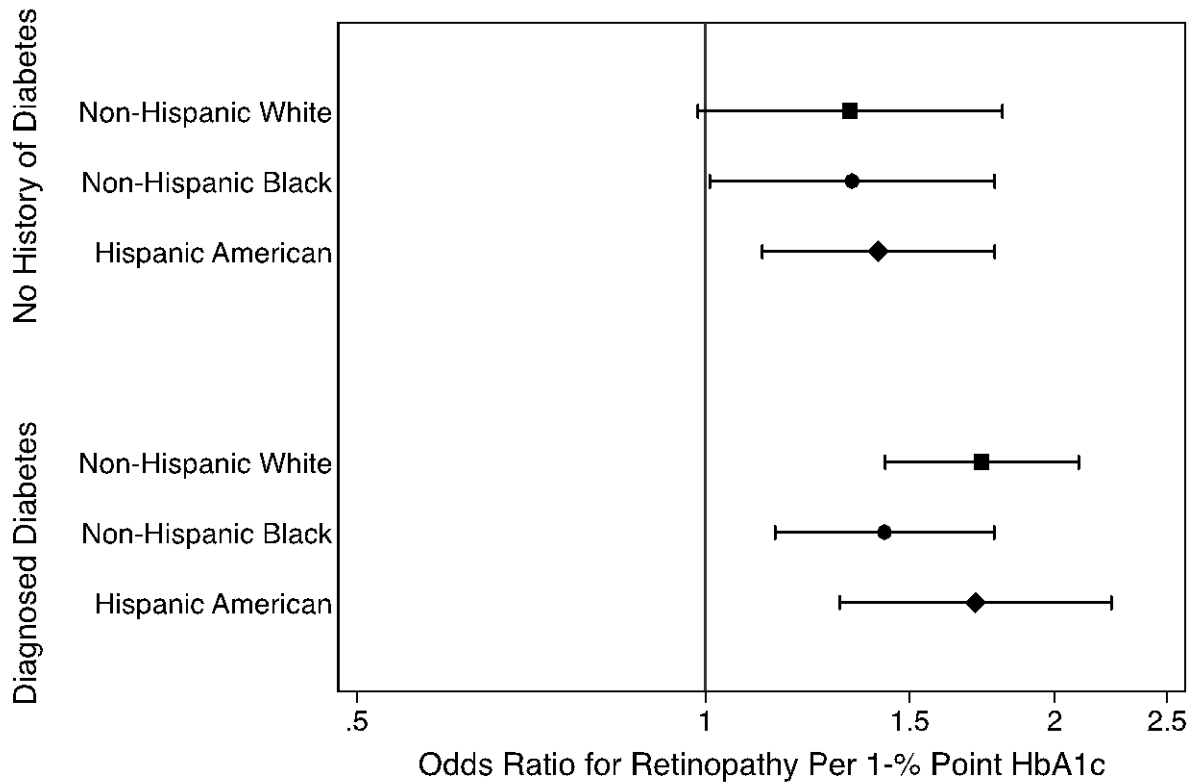

Weighted OR  $\pm$  SE and adjusted for age, sex, body mass index ( $\text{kg}/\text{m}^2$ ), hypertension status (yes; no), history of coronary heart disease (yes; no), total cholesterol (mg/dL), education ( $<12$  year;  $\geq 12$  years), income (poverty income ratio  $< 1$ ; poverty income ratio  $\geq 1$ ), and smoking status (current; former; never).

SUPPLEMENTARY DATA

**Supplementary Figure 3.** Age-adjusted Prevalence of Any Retinopathy\* by Ethnic Group and Decile of HbA1c%, Adults Aged  $\geq 40$  Years, U.S. 2005-2008

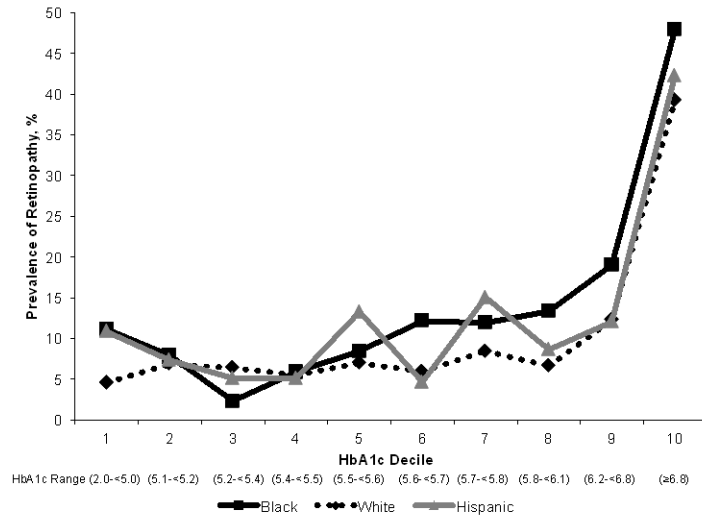

Retinopathy level was defined as an Early Treatment Diabetic Retinopathy Study level of 14 or greater. Estimates are weighted proportions and are age-standardized to the 2010 census population. Decile categories are based on the distribution of HbA1c in the study population.
